# Supplementary material for: Hypoxia increases KIAA1199/CEMIP expression and enhances cell migration in pancreatic cancer
Source: PubMed Central journal article supplement (PMC8440617; doi:10.1038/s41598-021-97752-z), 2021-09-14
Supplement: 41598_2021_97752_MOESM1_ESM.pdf [file 41598_2021_97752_MOESM1_ESM.pdf]

## Hypoxia increases KIAA1199/CEMIP expression and enhances cell migration in pancreatic cancer

Takuya Oba\*<sup>1</sup>, Norihiro Sato<sup>1</sup>, Yasuhiro Adachi<sup>1</sup>, Takao Amaike<sup>1</sup>, Yuzan Kudo<sup>1</sup>, Atsuhiko Koga<sup>2</sup>, Shiro Kohi<sup>1</sup>, Keiji Hirata<sup>1</sup>

### Affiliations

1) Department of Surgery 1, School of Medicine, University of Occupational and Environmental Health, Kitakyushu, JAPAN

2) Department of Surgery, Kyushu Rosai Hospital, Kitakyushu, JAPAN

### Corresponding author:

Takuya Oba, MD

Department of Surgery 1, School of Medicine, University of Occupational and Environmental Health, Kitakyushu 807-8555, JAPAN

+81-93-691-7441

t.oba0205@gmail.com

# Supplementary Figure.S1

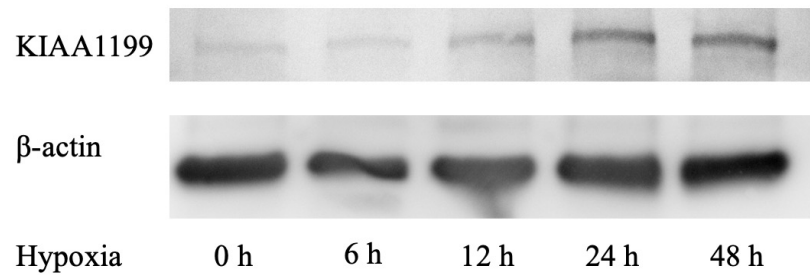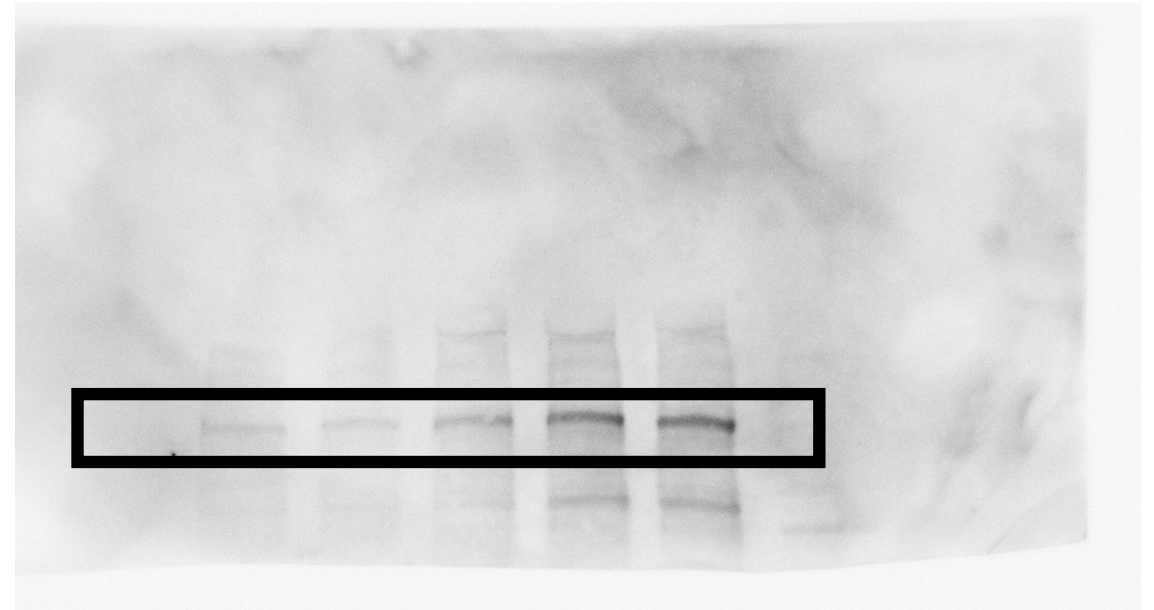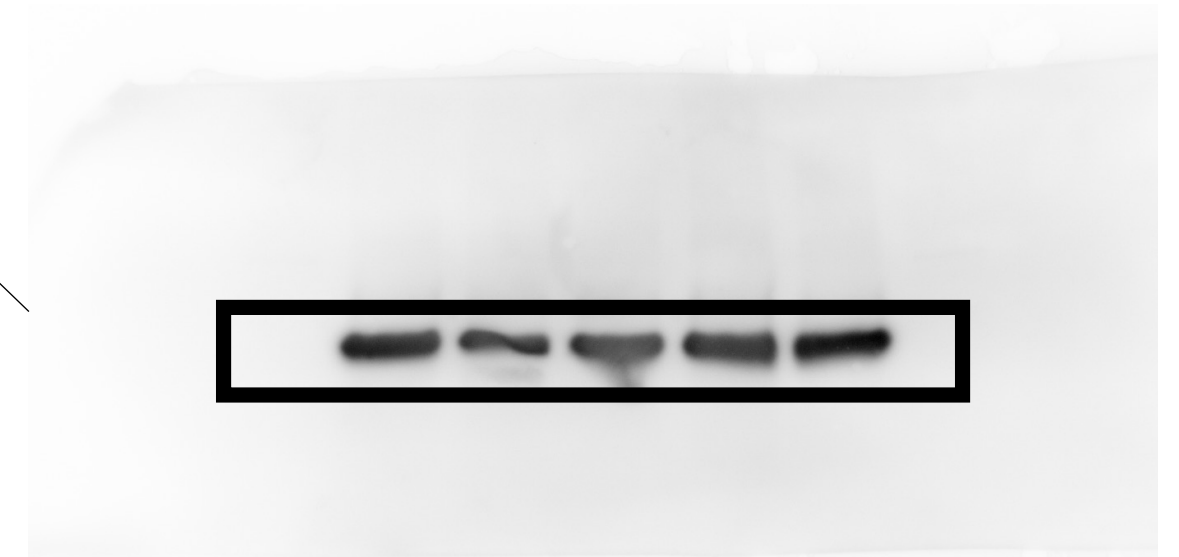

Title: Changes in expression of KIAA1199 in PDAC cell lines under normoxic and hypoxic conditions

## Legend:

KIAA1199 protein increased in a time-dependent manner under hypoxic conditions.  $\beta$ -actin levels were used as a loading control.

## Supplementary Figure.S2

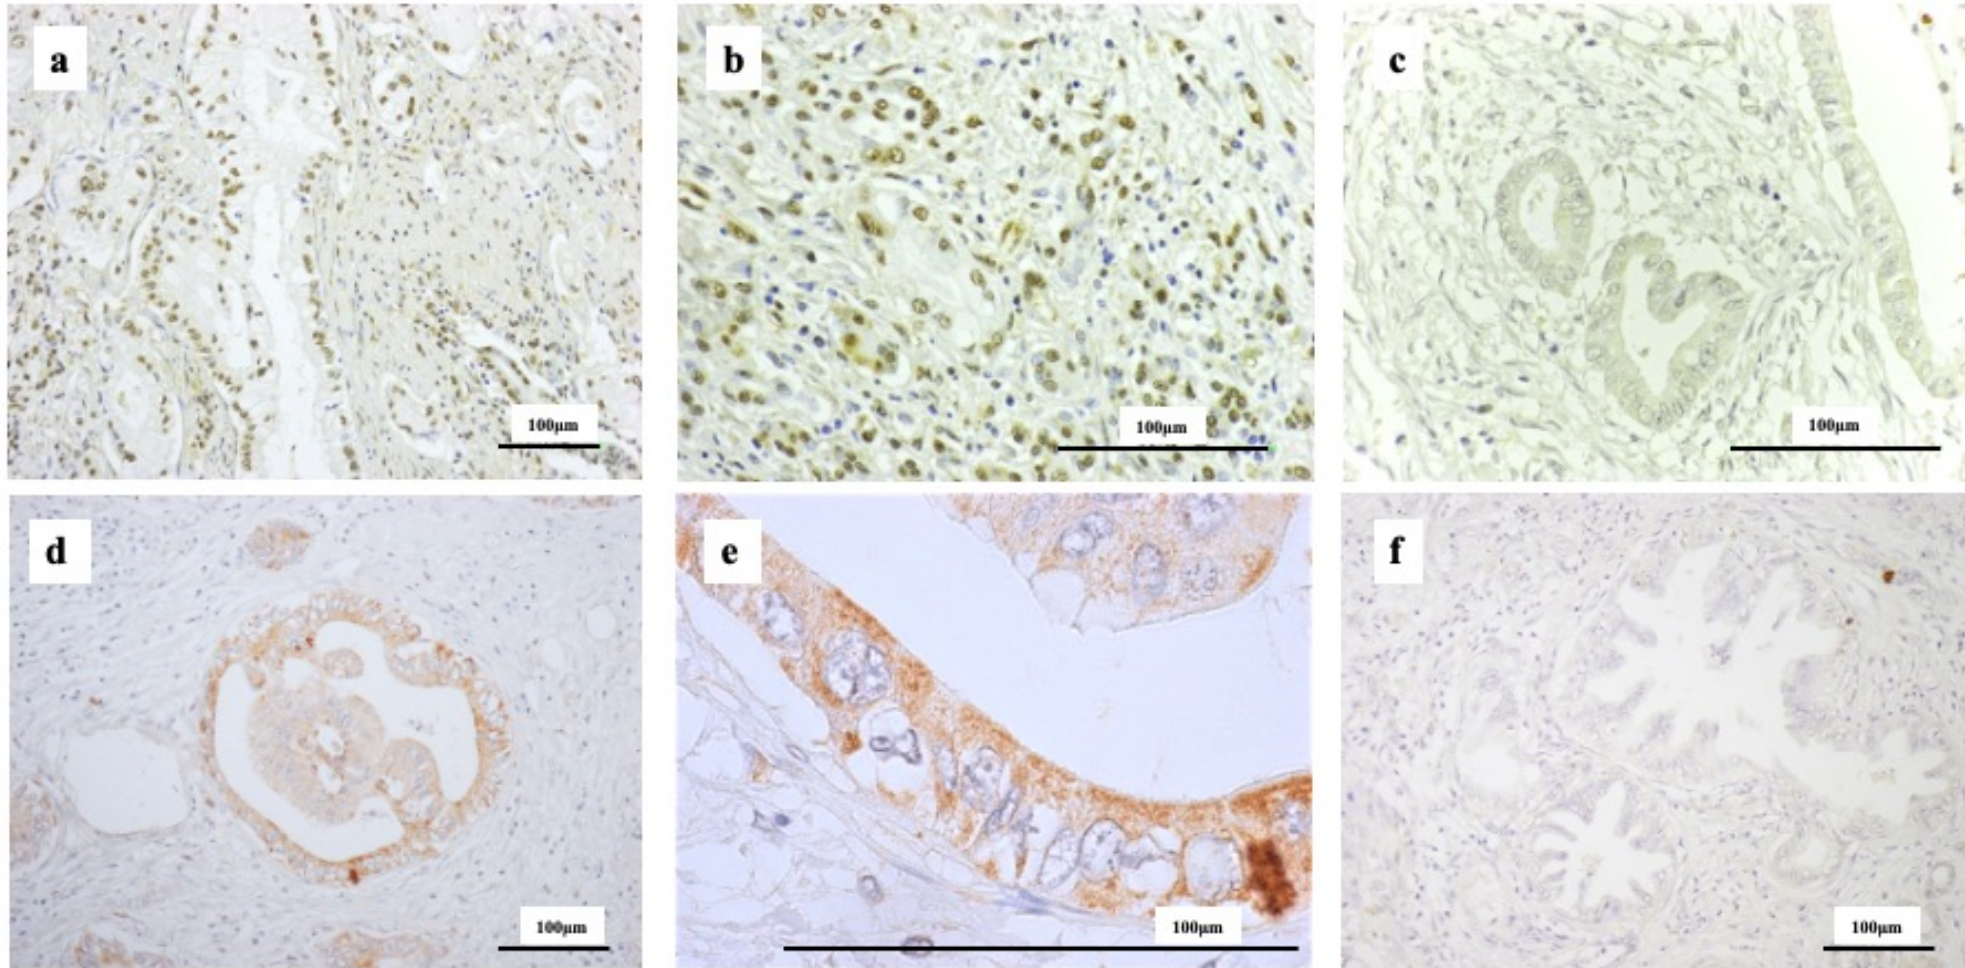

Title: Immunohistochemical analysis of KIAA1199 and HIF1 $\alpha$  in PDAC

Legend:

(a) (b) Images of strong nuclear labelling in PDAC cells classified as high HIF1 $\alpha$  expression group. (c) A Image as low HIF1 $\alpha$  expression group. (d) (e) Images of strong cytoplasmic labelling in PDAC cells classified as high KIAA1199 expression group. (f) A Image as low KIAA1199 expression group.
